# Supplementary material
Source: PubMed Central journal article supplement (PMC6375769)
Supplement: NIHMS995526-supplement-Supp_info.pdf [file NIHMS995526-supplement-Supp_info.pdf]

## Supplementary Section I

### Modeling Framework and Likelihood Estimation

Consider the 3-way table of G, E and D:

| Frequency      | G | E | D |
|----------------|---|---|---|
| $\mathbf{n}_1$ | 0 | 0 | 0 |
| $\mathbf{n}_2$ | 1 | 0 | 0 |
| $\mathbf{n}_3$ | 0 | 1 | 0 |
| $\mathbf{n}_4$ | 1 | 1 | 0 |
| $\mathbf{n}_5$ | 0 | 0 | 1 |
| $\mathbf{n}_6$ | 1 | 0 | 1 |
| $\mathbf{n}_7$ | 0 | 1 | 1 |
| $\mathbf{n}_8$ | 1 | 1 | 1 |

Denoting the vector of all cell counts as  $\mathbf{n} = [n_1 \dots n_8]^T$ , we assume a Poisson distribution for  $\mathbf{n}$  given model  $\mathcal{M}_i$

$$\mathbf{n} | \boldsymbol{\mu}, \mathcal{M}_i \sim \text{Poisson}(\boldsymbol{\mu})$$

and use a natural log link to model the Poisson parameter given model  $\mathcal{M}_i$  and design matrix  $\mathbf{X}_i$ ,

$$\log(\boldsymbol{\mu} | \mathcal{M}_i) = \mathbf{X}_i \boldsymbol{\beta}_i$$

$$\boldsymbol{\mu} | \mathcal{M}_i = e^{\mathbf{X}_i \boldsymbol{\beta}_i}$$

$$\boldsymbol{\beta}_i | \mathcal{M}_i \sim N(\mathbf{0}, \sigma^2 \mathbf{V}_i)$$

The marginal likelihood of model  $\mathcal{M}_i$  is

$$\Pr(\mathbf{n} | \mathcal{M}_i) = \int \Pr(\mathbf{n} | \boldsymbol{\theta}_i, \mathcal{M}_i) \Pr(\boldsymbol{\theta}_i | \mathcal{M}_i) d\boldsymbol{\theta}_i, \quad \boldsymbol{\theta}_i = [\boldsymbol{\beta}_i, \sigma^2]^T$$

where a closed-form solution for  $\Pr(\mathbf{n} | \mathcal{M}_i)$  is not analytically attainable due to the lack of conjugacy between the Gaussian prior and the Poisson likelihood. Hence, we use the GLIB (A.E.

Raftery & Richardson, 1996) routine within the BMA R package which utilizes Laplace estimation to estimate this likelihood. We implement GLIB with prior covariance matrix

$$\mathbf{V} = \sigma^2 \begin{bmatrix} \phi^2 \left( \frac{1}{n} \mathbf{X}_1^T \mathbf{X}_1 \right)^{-1} & \cdots & 0 \\ \vdots & \ddots & \vdots \\ 0 & \cdots & \phi^2 \left( \frac{1}{n} \mathbf{X}_p^T \mathbf{X}_p \right)^{-1} \end{bmatrix}.$$

where the hyperparameter  $\phi$  refers to a user-specified hyperparameter which is used in the prior variance calculation of effect estimates (Adrian E. Raftery, Madigan, & Hoeting, 1997), with larger values of  $\phi$  resulting in a preference for simpler models (A. E. Raftery, Madigan, D.M. and Hoeting, J., 1993). In our simulations and analyses  $\phi = 1$  is chosen based on suggestions by Raftery (1993).

## Supplementary Section II

### Simulation Specifications

We simulated an underlying population using the following sampling distributions and logistic regression equations in the following order:

$$E \sim \text{Bernoulli}(p_E) \quad (1)$$

$$\text{logit}(\text{Pr}(G = 1|E)) = \text{logit}(q_A) + \alpha_{cc_{ge}}(E - \bar{E}) \quad (2)$$

$$\text{logit}(\text{Pr}(Y = 1|E, G))$$

$$= \text{logit}(p_Y) + \beta_{cc_E}(E - \bar{E}) + \beta_{cc_G}(G - \bar{G}) + \beta_{cc_{G \times E}}(E - \bar{E})(G - \bar{G}) \quad (3)$$

From this population, we sampled equal numbers of cases and controls for all simulation scenarios for both single-marker and genome-wide simulations. When fitting the 1 and 2-degree-of-freedom

BMA models, we used the GLIB function in the BMA R package based on the Laplace approximation to the marginal likelihood (Adrian E Raftery, 1996). Prior means for all model parameters were set to  $\mathbf{0} = [0\ 0\ 0\ 0\ 0\ 0\ 0\ 0\ 0]^T$ . Prior model weights were set according to prior specified CC:CO odds for the models with 1:1 odds  $\Rightarrow \Pr(\mathcal{M}_{cc}) = \Pr(\mathcal{M}_{co}) = 0.5$  and 100:1 odds  $\Rightarrow \Pr(\mathcal{M}_{cc}) = 0.990099$  and  $\Pr(\mathcal{M}_{co}) = 0.00990099$ .

### Figure 3 Specifications

Figure 3 was created using a simulation of 1,000 replicates of a sample with size  $N = 10,000$  made up of 500 cases and 500 controls. We simulated 999,999 independent SNPs, and one designated ‘causal’ SNP with a non-zero interaction effect. Part (A) depicts a simulation without the marginal effects of E and G ( $\beta_{ccE} = \beta_{ccG} = \text{Log}(1.0)$ ) for the designated SNP. Part (B) depicts a simulation with constant marginal effects for all values of  $\beta_{ccG \times E}$ ,  $\beta_{ccE} = \beta_{ccG} = \text{Log}(1.2)$ , and part C is based on marginal effects induced through the increasing interaction effect based on values produced by Quanto (<http://biostats.usc.edu/Quanto.html>).

### Figure 4 Specifications

ROC curves shown in Figure 4 (A-C) were produced using a simulation of 1,000 replicates of a sample sized  $N = 10,000$  with 500 cases and 500 controls. We simulated 9980 independent SNPs part (A) and 9480 (parts B and C), and 20 designated ‘causal’ SNPs. Parts A and B depict effect sizes of  $\beta_{ccG \times E} = \text{Log}(1.3)$  and  $\beta_{ccG} = \text{Log}(1.2)$  and  $\beta_{ccE} = \text{Log}(1.0)$ , with  $\alpha_{ccGE} = \text{Log}(1.0)$  and  $\alpha_{ccGE} = \text{Log}(1.2)$  respectively for (A) and (B). Part (C) depicts effect sizes of  $\beta_{ccG \times E} = \text{Log}(1.0)$ ,  $\beta_{ccG} = \text{Log}(1.0)$ ,  $\beta_{ccE} = \text{Log}(1.0)$ , and  $\alpha_{ccGE} = \text{Log}(1.0)$ .

### Supplementary Section III

#### Asthma Application Models

We conducted the  $G \times PM_{2.5}$  analysis by specifying the following case-control log-linear equation:

$$\begin{aligned} \text{Log}(n|G, E, Y, C_k) &= \alpha_{cc0} + \alpha_{ccG}G + \alpha_{ccE}E + \alpha_{GE}GE + \beta_{cc0}Y + \beta_{ccG}GY + \beta_{ccE}EY + \beta_{ccG \times E}GEY \\ &+ \sum_k^4 \alpha_{ccC_k}C_k + Y \sum_k^4 \beta_{ccC_k}C_k \end{aligned}$$

where

$C_1 = \text{Sex (1: male, 0: female)}$

$C_2 = \text{Native American Ancestry (1: 5% - 50%, 0: otherwise)}$

$C_3 = \text{Native American Ancestry (1: >50%, 0: otherwise)}$

$C_4 = \text{Hispanic White (1: Hispanic White, 0: Non-Hispanic White)}$ .

Likewise, the  $G \times \text{Hispanicity}$  analysis used the following case-control log-linear equation:

$$\begin{aligned} \text{Log}(n|G, E, Y, C_k) &= \alpha_{cc0} + \alpha_{ccG}G + \alpha_{ccE}E + \alpha_{GE}GE + \beta_{cc0}Y + \beta_{ccG}GY + \beta_{ccE}EY + \beta_{ccG \times E}GEY \\ &+ \sum_k^3 \alpha_{ccC_k}C_k + Y \sum_k^3 \beta_{ccC_k}C_k \end{aligned}$$

with the omission of  $C_4$  as Hispanicity is captured here by E.

## G x Hispanicity QQ Plots

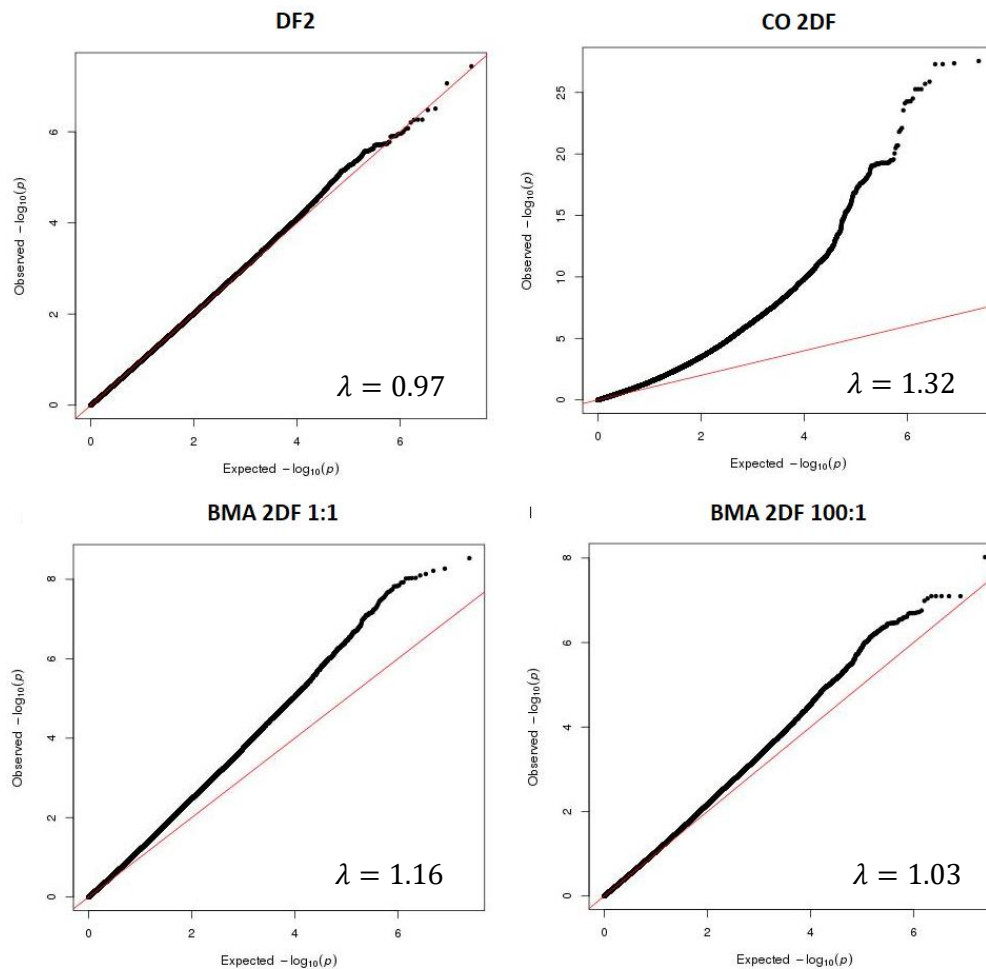

Figure 1 QQ-plots from asthma analysis in the CHS for Hispanicity x G analysis by method (clockwise) DF2, CO 2DF, and BMA 2DF. BMA 2DF analysis was conducted using a CC:CO prior odds of 1:1 and 100:1 favoring the CC model over the CO model. Markers which result in zero contingency table cells have been removed.

## Supplementary Section IV

### Software

Simulations and analysis used the GLIB function in the BMA R-package (Adrian Raftery, 2015; A.E. Raftery & Richardson, 1996). Software used to carry out the BMA 2DF approach specifically is available for download as the “bma.gxe” R-package through GitHub at <https://github.com/LilithMoss/bma.gxe.git>.

### References

- Adrian Raftery, J. H., Chris Volinsky, Ian Painter and Ka Yee Yeung. (2015). BMA: Bayesian Model Averaging (Version 3.18.6). Retrieved from <http://CRAN.R-project.org/package=BMA>
- Raftery, A. E. (1996). Approximate Bayes factors and accounting for model uncertainty in generalized linear models *Biometrika*, 83(2), 251-266.
- Raftery, A. E., Madigan, D., & Hoeting, J. A. (1997). Bayesian Model Averaging for Linear Regression Models *Journal of the American Statistical Association*, 92(437), 179-191.
- Raftery, A. E., Madigan, D.M. and Hoeting, J. (1993). Model selection and accounting for model uncertainty in linear regression models (U. o. W. Department of Statistics, Trans.) *Technical Report*.
- Raftery, A. E., & Richardson, S. (1996). Model selection for generalized linear models via GLIB, with application to epidemiology. In D. A. B. a. D. K. Stangl (Ed.), *Bayesian Biostatistics* (pp. 321-354). New York: Marcel Dekker.
